# Supplementary material
Source: Springer Nature journal article supplement (https://www.springermedizin.de/resource/supplementary/12985_2012_2134_MOESM5_ESM.pdf/9606692)

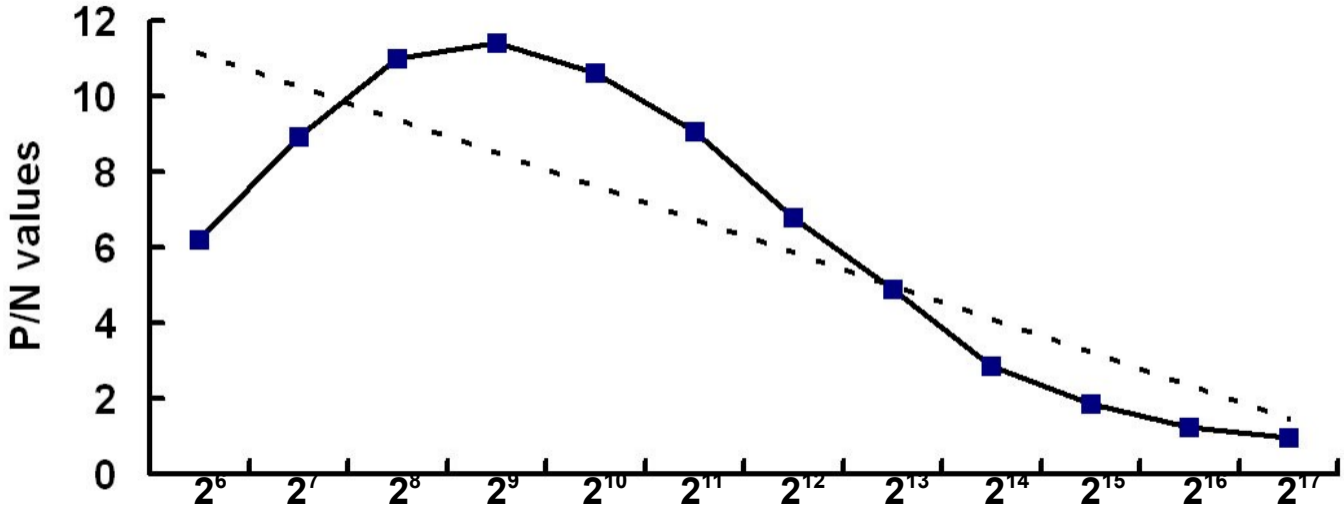

Supplement: MOESM5 [file 9606692]
